# Supplementary material for: Effect of Salinity Stress on Growth and MetabolomicProfiling of Cucumis sativus and Solanum lycopersicum
Source: PubMed Central journal article supplement (PMC7700630; doi:10.3390/plants9111626), 2020-11-23
Supplement: plants-09-01626-s001.pdf [file plants-09-01626-s001.pdf]

Table (Suppl. 1). Effect of salt stress on physiological and biochemical characteristics of *Cucumis sativus* and *Solanum lycopersicum*

|                        | Parameters     | Salt concentration |               |             |             |              |
|------------------------|----------------|--------------------|---------------|-------------|-------------|--------------|
|                        |                | Control            | 25mM          | 50mM        | 100mM       | 200mM        |
| <i>C. sativus</i>      | Flavonoid      | 1.92±0.15          | 1.86±0.29     | 1.88±0.40   | 1.81±0.26   | 1.96±0.42    |
|                        | Phenolics      | 0.32±0.09          | 0.34±0        | 0.31±0.59   | 0.28±0.01   | 0.24±0       |
|                        | Saponins       | 23.74±0.39         | 24.76±0.45*   | 24.24±0.38  | 23.18±0.17  | 22.63±0.55*  |
|                        | T. antioxidant | 3159±140.77        | 3399±193      | 3153±43     | 3113±95     | 3021±44      |
|                        | Chlorophyll a  | 400±41.89          | 685±382       | 405±47      | 414±81      | 470±27       |
|                        | Chlorophyll b  | 301±38             | 221±247       | 286±33      | 374±103     | 528±75**     |
|                        | Proline        | 0.10±0.01          | 0.08±0.04     | 0.07±0.05   | 0.04±0***   | 0.03±0***    |
| <i>S. lycopersicum</i> | Flavonoid      | 1.34±0.16          | 1.09±0.11     | 0.99±0.32   | 1.49±0.11   | 1.74±.06     |
|                        | Phenolics      | 0.27±0.02          | 0.30±0.03     | 0.40±0.04** | 0.38±0.05*  | 0.47±0.03*** |
|                        | Saponins       | 39.25±1.27         | 31.30±0.13*** | 32.58±2.21* | 33.77±2.04* | 52.95±1.41   |
|                        | T. antioxidant | 2343±70            | 2181±51*      | 2253±39     | 2166±40*    | 2298±284     |
|                        | Chlorophyll a  | 589±32             | 586±18        | 606±17      | 591±9       | 599±3        |
|                        | Chlorophyll b  | 371±57             | 355±32        | 405±43      | 452±179     | 439±6        |
|                        | Proline        | 0.24±0.19          | 0.11±0.04     | 0.07±0.02   | 0.09±0.02   | 0.11±0.02    |

\*\*\*= very highly significant, \*\* =highly significant, \*=significant, T. antioxidant = total antioxidant capacity
